# Supplementary material for: The association between TNF-receptors (TNFR1 and TNFR2) and mortality as well as kidney function decline in patients with chronic kidney disease
Source: PubMed Central journal article supplement (PMC11653433; doi:10.48101/ujms.v129.10726), 2024-11-25

**Supplementary files.**

**Supplementary Figure 1. Nelson-Aalen plot of cumulative incidence of mortality by participants divided in quartiles according to concentrations of TNFR1.**

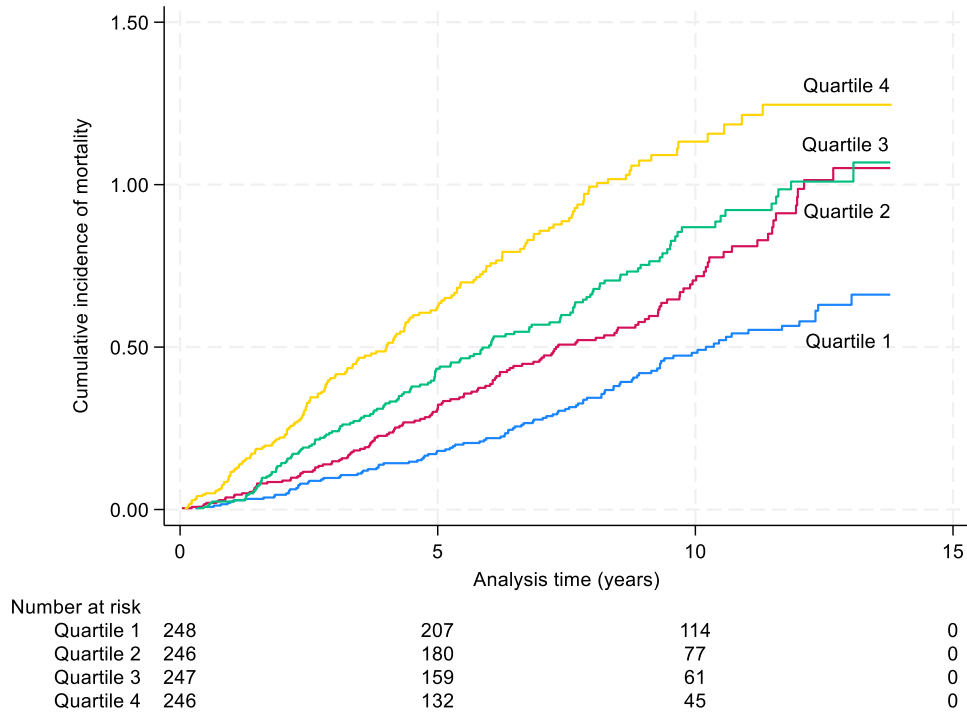

**Supplementary Figure 2. Nelson-Aalen plot of cumulative incidence of mortality by participants divided in quartiles according to concentrations of TNFR2.**

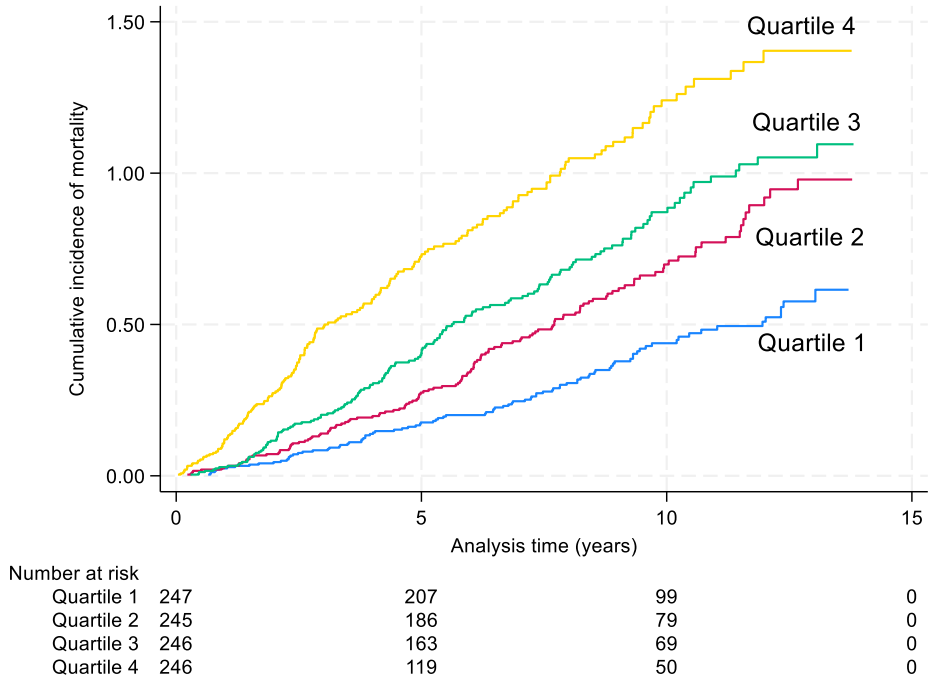

Supplement: UJMS-129-10726-s1.pdf [file UJMS-129-10726-s1.pdf]
